# Supplementary material for: A simple ‘in situ’ co-precipitation method for the preparation of multifunctional CoFe2O4–reduced graphene oxide nanocomposites: excellent microwave absorber and highly efficient magnetically separable recyclable photocatalyst for dye degradation
Source: Royal Society of Chemistry journal article supplement (doi:10.1039/c6ra17384e), 2016-01-01
Supplement: c6ra17384e1.pdf [file c6ra17384e1.pdf]

## Electronic Supplementary Information

### **A Simple '*in situ*' Co-precipitation Method for Preparation of Multifunctional CoFe<sub>2</sub>O<sub>4</sub>-Reduced Graphene Oxide Nanocomposites: Excellent Microwave Absorber and Highly Efficient Magnetically Separable Recyclable Photocatalyst for Dye Degradation.**

Debabrata Moitra,<sup>a</sup> Madhurya Chandel,<sup>a</sup> Barun Kumar Ghosh,<sup>a</sup> Raj Kumar Jani,<sup>b</sup> Manoj Kumar Patra,<sup>b</sup> Sampat Raj Vadera,<sup>b</sup> and Narendra Nath Ghosh,<sup>\*</sup>

<sup>a</sup>Nano-materials Lab, Department of Chemistry, Birla Institute of Technology and Science, Pilani K.K. Birla Goa Campus, Goa-403726, India.

<sup>b</sup>Defence Lab, Jodhpur 342011, India.

Corresponding author. Tel. /fax: +91 832 2580318/2557033.

E-mail address: naren70@yahoo.com (N. N. Ghosh)

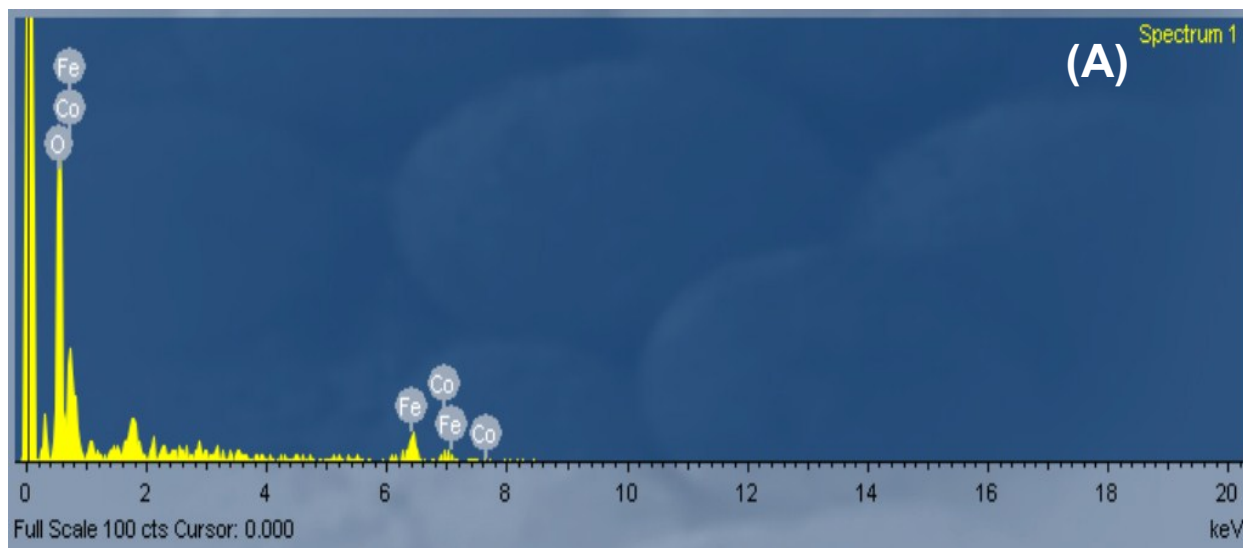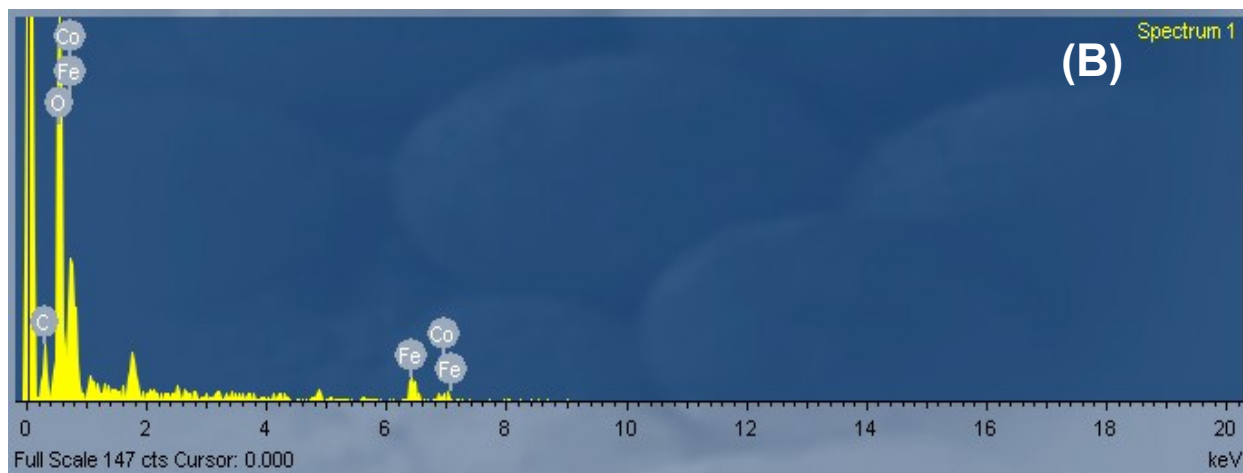

**Fig S1.** EDAX spectra of (A) synthesized  $\text{CoFe}_2\text{O}_4$  nanoparticle and (B)  $\text{CoFe}_2\text{O}_4$ -RGO nanocomposite.

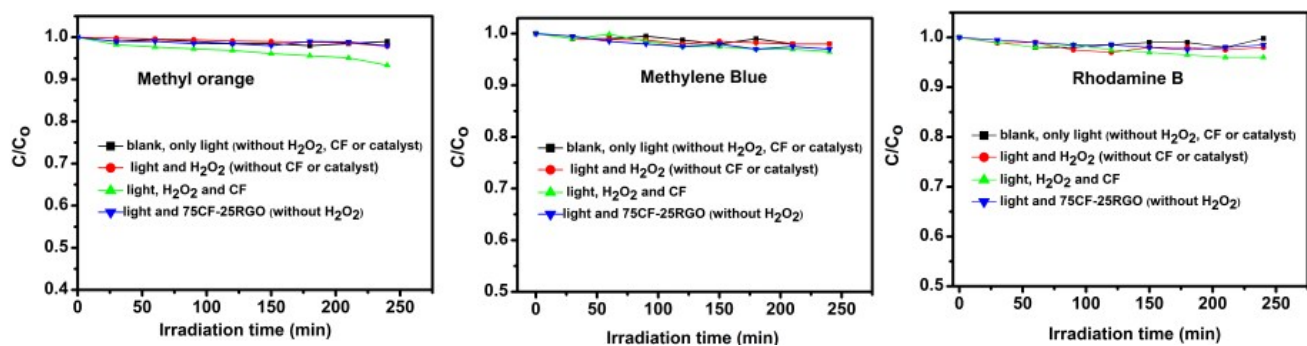

**Fig S2:** These  $C/C_0$  vs. Irradiation time plots show that photocatalysis reactions of dyes do not occur in absence of CF-RGO and  $H_2O_2$ .

**Table S1:** Microwave absorption properties of various ferrites and ferrite based composites

| Samples                                                                                                                                                    | Preparation Method                                | Minimum Reflection loss | Corresponding Frequency (GHz) | Absorber thickness | Effective band width (RL < -10dB) | Ref. |
|------------------------------------------------------------------------------------------------------------------------------------------------------------|---------------------------------------------------|-------------------------|-------------------------------|--------------------|-----------------------------------|------|
| NiFe <sub>2</sub> O <sub>4</sub>                                                                                                                           | Hydrothermal at 180°C for 6h                      | -24 dB                  | 9.5 GHz                       | 3.5 mm             | 8.5 to 13 GHz                     | [11] |
| 60 wt % ZnO/CoFe <sub>2</sub> O <sub>4</sub>                                                                                                               | Co-precipitation method 90°C                      | -28.3 dB                | 8.6 GHz                       | -                  | 4.1 to 13 GHz                     | [12] |
| (Mn <sub>0.2</sub> Ni <sub>0.4</sub> Zn <sub>0.4</sub> Fe <sub>2</sub> O <sub>4</sub> ) <sub>x</sub> -(BaFe <sub>12</sub> O <sub>19</sub> ) <sub>1-x</sub> | One pot precursor based method 800°C for 4h       | -25 dB                  | 8.2 GHz                       | 3.5 mm             | -                                 | [28] |
| (NiFe <sub>2</sub> O <sub>4</sub> ) <sub>0.85</sub> -(SrFe <sub>12</sub> O <sub>19</sub> ) <sub>0.15</sub>                                                 | One pot precursor based method 800°C for 4h       | -17 dB                  | 8.2 GHz                       | 3.2 mm             | -                                 | [29] |
| Co <sub>0.6</sub> Zn <sub>0.4</sub> Fe <sub>2</sub> O <sub>4</sub> nanofiber.                                                                              | Calcination at 700°C for 2h                       | -16 dB                  | 10.6 GHz                      | 2.9 mm             | 7.8 to 16.8 GHz                   | [30] |
| Hollow glass microsphere/ CoFe <sub>2</sub> O <sub>4</sub>                                                                                                 | Co-precipitation method                           | -8.3 dB                 | 18 GHz                        | 1.5 mm             | -                                 | [31] |
| SrFe <sub>12</sub> O <sub>19</sub> / CoFe <sub>2</sub> O <sub>4</sub>                                                                                      | Co-precipitation at 1200°C for 4h                 | -27.6 dB                | 10.8 GHz                      | -                  | 8.2 to 9.6 GHz                    | [33] |
| N-RGO-Hematite wax composite                                                                                                                               | Refluxed in presence of PVP at 105°C for 24h      | -78 dB                  | 15.4 GHz                      | 2 mm               | 11.3 to 18 GHz                    | [36] |
| ZnFe <sub>2</sub> O <sub>4</sub> /RGO                                                                                                                      | Hydrothermal synthesis at 180°C                   | -29.3 dB                | 16.7 GHz                      | 1.6 mm             | 15.4 to 18 GHz                    | [47] |
| CoFe <sub>2</sub> O <sub>4</sub> hollow / Graphene composites                                                                                              | Vapour diffusion followed by calcination at 550°C | -18.5 dB                | 12.9 GHz                      | 2 mm               | 11.3 to 15 GHz.                   | [48] |
| NiFe <sub>2</sub> O <sub>4</sub> nanorod-graphene                                                                                                          | Solvothermal 150°C for 15h.                       | -29.2 dB                | 16.1 GHz                      | 2.0 mm             | 13.6 to 18 GHz                    | [49] |
| CoFe <sub>2</sub> O <sub>4</sub> nanorod /Graphene                                                                                                         | Hydrothermal at 150°C                             | -25.8 dB                | 16.1 GHz                      | 2.0 mm             | 13.5 to 18 GHz.                   | [50] |
| (RGO)/CoFe <sub>2</sub> O <sub>4</sub> composite                                                                                                           | One-pot hydrothermal route at 180°C for 10h       | -47.9dB                 | 12.4 GHz                      | 2.3mm              | 12.4 to 17.4 GHz                  | [51] |

|                                                                                                                                                       |                                                            |                             |                             |                      |                          |      |
|-------------------------------------------------------------------------------------------------------------------------------------------------------|------------------------------------------------------------|-----------------------------|-----------------------------|----------------------|--------------------------|------|
| Graphene-Fe <sub>3</sub> O <sub>4</sub>                                                                                                               | Hydrothermal at 200°C for 24h                              | -20 dB                      | 16 GHz                      | 5 mm                 | -                        | [52] |
| 30 wt.% hollow Fe <sub>3</sub> O <sub>4</sub> /RGO                                                                                                    | Solvothermal method. 200°C for 12h.                        | -24 dB                      | 12.9 GHz                    | 2.0 mm               | 10.8 to 15.7 GHz         | [53] |
| RGO/CoFe <sub>2</sub> O <sub>4</sub>                                                                                                                  | Hydrothermal at 180°C for 10h.                             | -47.9 dB                    | 2.4 GHz                     | 2.3 mm               | 12.4 to 17.4 GHz         | [54] |
| 5 wt. % filler RGO/MnFe <sub>2</sub> O <sub>4</sub> /PVDF                                                                                             | Hydrothermal at 140°C for 12h                              | -29 dB                      | 9.2 GHz                     | 3 mm                 | 8 to 12.88 GHz           | [55] |
| 10 wt. % filler RGO/Co <sub>3</sub> O <sub>4</sub> /Poly(vinylidene fluoride)                                                                         | Hydrothermal at 140°C for 12h.                             | -25 dB                      | 11.6 GHz                    | 4 mm                 | 7.5 to 12 GHz            | [56] |
| RGO/ Fe <sub>3</sub> O <sub>4</sub>                                                                                                                   | One pot Co-precipitation at 80°C for 2h                    | -44.6 dB                    | 6.6 GHz                     | 3.9 mm               | 12.2 to 16.5 GHz         | [61] |
| CoFe <sub>2</sub> O <sub>4</sub>                                                                                                                      | Co-precipitation method 120°C for 12h                      | -55dB                       | 9.25 GHz                    | 2 mm                 | 8.2 to 10.8 GHzGHz       | [63] |
| 50NZF-50RGO nanocomposite                                                                                                                             | In situ Co-precipitation method at 120°C for 12h           | -19.99dB                    | 11.58 GHz                   | 1.8 mm               | 10.22 to 12.4 GHz        | [68] |
| ZnFe <sub>2</sub> O <sub>4</sub> /ppy                                                                                                                 | Polymerization under 80°C for 8 h                          | -28.9 dB                    | 10.8 GHz                    | 2.7 mm               | -                        | [70] |
| a) EG/PANI/ CoFe <sub>2</sub> O <sub>4</sub> with m <sub>CF</sub> / m <sub>EG</sub> / m <sub>PANI</sub> of 0.8<br>b) CoFe <sub>2</sub> O <sub>4</sub> | Co-precipitation method sintered at 300°C                  | a) -19.13 dB<br>b)-13.58 dB | a)13.28 GHz<br>b) 14.83 GHz | a) 0.5 mm<br>b) 1 mm | a) 5.94GHz<br>b)3.6 GHz. | [71] |
| CNT/ CoFe <sub>2</sub> O <sub>4</sub>                                                                                                                 | Chemical Vapor Deposition                                  | -18 dB                      | 9 GHz                       | -                    | 6.5 to 13.5 GHz          | [72] |
| Rugby Shaped CoFe <sub>2</sub> O <sub>4</sub>                                                                                                         | Vapour diffusion followed by calcination at 550°C          | -34.1 dB                    | 13.4 GHz                    | 2.5 mm               | 12.3 to 14.9 GHz.        | [73] |
| CoFe <sub>2</sub> O <sub>4</sub> / SBA-15                                                                                                             | Double solvent technique and incipient impregnation method | -18 dB                      | 16 GHz                      | 2 mm                 | 13.5 to 18 GHz.          | [74] |

|                                                                                                                                                |                                                                                    |           |            |         |                   |           |
|------------------------------------------------------------------------------------------------------------------------------------------------|------------------------------------------------------------------------------------|-----------|------------|---------|-------------------|-----------|
| Polyaniline-CoFe <sub>2</sub> O <sub>4</sub>                                                                                                   | Citrate precursor based method at 1000°C                                           | -21.5 dB  | -          | -       | -                 | [75]      |
| Ni <sub>0.5</sub> Co <sub>0.5</sub> Fe <sub>2</sub> O <sub>4</sub>                                                                             | Co-precipitation at 85°C                                                           | -18 dB    | 2.47 GHz   | 1.5 mm  | -                 | [76]      |
| Graphene@Fe <sub>3</sub> O <sub>4</sub> @SiO <sub>2</sub> @NiO                                                                                 | Sol-Gel process with hydrothermal reaction followed by calcination at 400°C for 2h | -51.5 dB  | 14.6 GHz   | 1.8 mm  | 12.4-17.5 GHz     | [77]      |
| (Ni <sub>0.65</sub> Zn <sub>0.35</sub> Fe <sub>2</sub> O <sub>4</sub> ) <sub>0.85</sub> -(BaFe <sub>12</sub> O <sub>19</sub> ) <sub>0.15</sub> | One pot precursor based method 800°C for 4h                                        | -21 dB    | 9.86 GHz   | 3.05 mm | -                 | [78]      |
| Flaky graphite/cobalt zinc ferrite                                                                                                             | Calcined at 700°C for 2h                                                           | -33.85 dB | 11.7 GHz   | 2.5 mm. | 10.3 to 13.5 GHz  | [79]      |
| BaFe <sub>12</sub> O <sub>19</sub> @RGO                                                                                                        | Calcination at 900°C for 2h                                                        | -32 dB    | -          | 3 mm.   | -                 | [80]      |
| BaFe <sub>11.92</sub> (LaNd) <sub>0.04</sub> O <sub>19</sub> -TiO <sub>2</sub> /MCNTs/wax composite                                            | Sintering at 1200°C for 3h                                                         | -21.56 dB | 11.04 GHz  | 2 mm    | 9.50 to 12.75 GHz | [81]      |
| Fe <sub>3</sub> O <sub>4</sub> /C composite                                                                                                    | Calcination at 600°C                                                               | -46 dB    | 12.8 GHz   | 2.9 mm  | 10.3 to 17.1GHz.  | [82]      |
| Fe <sub>3</sub> O <sub>4</sub> -Fe/G composite                                                                                                 | Calcination at 420°C for 3h                                                        | -30 dB    | 4.72 GHz   | 2.0 mm  | 6.2 GHz           | [83]      |
| Graphene/Fe <sub>3</sub> O <sub>4</sub> incorporated polyaniline                                                                               | Refluxing at 80°C for 5h                                                           | -26 dB    | 15 GHz     | -       | -                 | [84]      |
| graphene/BaFe <sub>12</sub> O <sub>19</sub>                                                                                                    | Calcination at 1100°C for 1h                                                       | -58 dB    | 11.42 GHz. | -       | -                 | [85]      |
| 85CF-15RGO                                                                                                                                     | Co-precipitation reduction at 160°C at 16h                                         | -31.13 dB | 9.05 GHz   | 2.15 mm | 8.2 to 10.92 GHz  | This work |

**Table S2:** Comparison of photocatalytic activity of 75CF-25RGO nanocomposite with those of the other reported RGO-Ferrite and RGO based nanocomposites.

| Composite                                                       | Preparation method                          | Amount of catalyst | Dye concentration                              | Source                                     | Time    | Dye                                | Reference |
|-----------------------------------------------------------------|---------------------------------------------|--------------------|------------------------------------------------|--------------------------------------------|---------|------------------------------------|-----------|
| TiO <sub>2</sub> -Fe <sub>3</sub> O <sub>4</sub> -RGO composite | Hydrothermal at 105°C for 24h               | 0.01g in 40 ml     | 0.0535 mmol/L                                  | Visible Light Xe lamp 500W                 | 120 min | MB                                 | [24]      |
| Fe <sub>3</sub> O <sub>4</sub> -RGO -TiO <sub>2</sub> composite | Hydrothermal at 200°C for 10h               | 1.5 g/L            | 10 mg/L                                        | Visible light 300W UV-Vis Xenon Lamp>400nm | 120 min | MB                                 | [25]      |
| CoFe <sub>2</sub> O <sub>4</sub> -TiO <sub>2</sub>              | Hydrothermal at 150°C for 24h               | 20 mg in 5 ml      | 5 ppm aqueous solution (initial concentration) | UV light irradiation 8W UV -Hg lamp 5 sets | 6 h     | MB                                 | [26]      |
| CoFe <sub>2</sub> O <sub>4</sub> -RGO (10wt. %)                 | Hydrothermal at 180°C for 12h               | 20 mg in 200 ml    | 10 mg/L                                        | Tungsten halogen lamp 500 W                | 180 min | MB                                 | [38]      |
| CoFe <sub>2</sub> O <sub>4</sub> -RGO (45 wt. %)                | Ball milling for 6h at 25 sec <sup>-1</sup> | 0.01g /40mL        | 20mg/L                                         | Visible light Xe lamp 800W cutoff λ >420nm | 180 min | MB, RhB, and MO                    | [39]      |
| (3%)P25/ CoFe <sub>2</sub> O <sub>4</sub> /RGO                  | Hydrothermal at 180°C for 20h               | 10 mg in 30 ml     | 40 mg/L                                        | Visible light Xe lamp 500W cutoff λ >420nm | 240 min | MB                                 | [40]      |
| CoFe <sub>2</sub> O <sub>4</sub> -RGO (40 wt. %)                | Hydrothermal at 180°C for 20h               | 25 mg in 100 ml    | 20mg/L                                         | Visible light Xe lamp 500W cutoff λ >420nm | 240 min | MB (100%)<br>MO (94%)<br>RhB (71%) | [41]      |

| Composite                                                       | Preparation method                                   | Amount of catalyst | Dye concentration         | Source                                                                           | Time                                                  | Dye                                            | Reference |
|-----------------------------------------------------------------|------------------------------------------------------|--------------------|---------------------------|----------------------------------------------------------------------------------|-------------------------------------------------------|------------------------------------------------|-----------|
| ZnFe <sub>2</sub> O <sub>4</sub> -RGO (20 wt. %)                | Hydrothermal at 180°C for 12h                        | 0.05g in 100 ml    | 20 mg/L                   | Visible light<br>Xe lamp<br>500W cutoff<br>$\lambda > 420\text{nm}$              | 90 min                                                | MB                                             | [42]      |
| MnFe <sub>2</sub> O <sub>4</sub> -graphene (30 wt. %)           | Hydrothermal at 180°C for 20h                        | 0.025 g in 100 mL  | 20 mg/L                   | 500 W mercury and xenon lamp cutoff<br>$\lambda > 420\text{nm}$<br>Visible light | 360 min                                               | MB                                             | [43]      |
| RGO-MFe <sub>2</sub> O <sub>4</sub> (M=Zn, Co and Ni)           | Hydrothermal at 200°C for 10h                        | 20 mg in 150 ml    | 10 mg/L                   | Tungsten lamp 500 W                                                              | 180 min                                               | RhB and MB                                     | [44]      |
| CdFe <sub>2</sub> O <sub>4</sub> /Graphene                      | Hydrothermal at 180°C for 12h                        | 100 mg in 100 ml   | 10 mg/L                   | Xe lamp<br>500W cutoff<br>$\lambda > 420\text{nm}$<br>Visible light              | 240 min                                               | MB                                             | [45]      |
| Bi <sub>2</sub> Fe <sub>2</sub> O <sub>9</sub> /RGO (4.5 wt. %) | Hydrothermal at 95°C 36h                             | 0.5mg/L            | 10mg/L                    | 150W Xenon arc Lamp<br>Visible light                                             | 3h                                                    | Bisphenol-A                                    | [46]      |
| Graphene-SnO <sub>2</sub> aerosol nanocomposite                 | Hydrothermal at 180°C for 12h                        | 100 mg in 200 ml   | $4.79 \times 10^{-5}$ g/L | 300W Xenon Lamp cutoff<br>$\lambda > 400\text{nm}$<br>Visible light              | 40 min                                                | RhB                                            | [88]      |
| 75CF-25RGO                                                      | Co-precipitation followed by reflux at 160°C for 16h | 500 mg/L           | 20 mg/L                   | 100 W Reading lamp<br>Visible light                                              | i) 60 min<br>ii) 75 min<br>iii) 45 min<br>iv) 120 min | i) MO<br>ii) MB<br>iii) RhB<br>iv) Dye mixture | This work |

MB= Methylene Blue, MO= Methyl Orange and RhB= Rhodamine B
